# Supplementary material
Source: PubMed Central journal article supplement (PMC3513776)
Supplement: NIHMS403729-supplement-Supp_Info.pdf [file NIHMS403729-supplement-Supp_Info.pdf]

## SUPPLEMENTARY INFORMATION

### SI FIGURE CAPTIONS

**SI Figure 1.** Sequence differences in the crystallographic structures of the F1\*S and A variants of human AGP. *Top panel.* The amino acid sequence alignment with conserved positions shaded. *Bottom panel.* The amino acid sequence differences mapped onto the crystallographic structure of each variant shown in ribbon representation with amino acid difference in stick representation and labeled in single letter code.



**SI Table 1.** Isothermal titration calorimetric parameters for binding of basic drugs to AGP at 30°C in 20 mM HEPES pH 7.4

| Parameter                           | Chlorpromazine                                                                    | Amitriptyline                                                                     | Imipramine                                                                        | Dothepin                                                                            | Nortriptyline                                                                       |
|-------------------------------------|-----------------------------------------------------------------------------------|-----------------------------------------------------------------------------------|-----------------------------------------------------------------------------------|-------------------------------------------------------------------------------------|-------------------------------------------------------------------------------------|
|                                     | 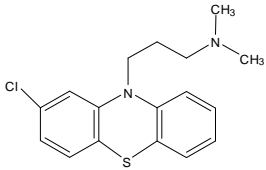 |  |  |  |  |
| <sup>a</sup> clogD<br>pH 7.4        | 3.2                                                                               | 4.3                                                                               | 2.4                                                                               | 3.8                                                                                 | 3.1                                                                                 |
| PSA                                 | 6.5                                                                               | 3.2                                                                               | 6.5                                                                               | 3.2                                                                                 | 12                                                                                  |
| <i>n</i>                            | 0.97                                                                              | 1.93                                                                              | 2.81                                                                              | 2.58                                                                                | 2.13                                                                                |
| <b>K<sub>d</sub></b><br>(μM)        | 21.9                                                                              | 32.9                                                                              | 69.9                                                                              | 84.7                                                                                | 123                                                                                 |
| <b>ΔH</b><br>(kcal/mol)             | -3.91                                                                             | -1.40                                                                             | -3.27                                                                             | -4.10                                                                               | -2.88                                                                               |
| <b>TΔS</b><br>(kcal/mol)            | 2.50                                                                              | 4.85                                                                              | 2.48                                                                              | 1.55                                                                                | 2.54                                                                                |
| <b>ΔG<sub>o</sub></b><br>(kcal/mol) | -6.41                                                                             | -6.25                                                                             | -5.75                                                                             | -5.65                                                                               | -5.42                                                                               |

| Parameter                             | Desimipramine                                                                     | Miaserine                                                                         | Triimipramine                                                                     | Disopyramide                                                                       | Cimetidine                                                                          |
|---------------------------------------|-----------------------------------------------------------------------------------|-----------------------------------------------------------------------------------|-----------------------------------------------------------------------------------|------------------------------------------------------------------------------------|-------------------------------------------------------------------------------------|
|                                       | 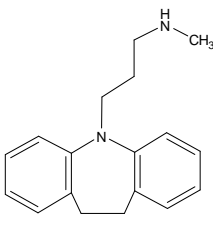 |  |  |  |  |
| <sup>a</sup> clogD<br>pH 7.4          | 1.2                                                                               | 2.8                                                                               | 2.9                                                                               | 0.31                                                                               | 0.2                                                                                 |
| PSA                                   | 15                                                                                | 6.5                                                                               | 6.5                                                                               | 59                                                                                 | 85                                                                                  |
| <i>n</i>                              | 1.88                                                                              | 2.55                                                                              | 2.80                                                                              | 1.50                                                                               | 2.36                                                                                |
| <b>K<sub>a</sub></b><br>( $\mu$ M)    | 149                                                                               | 219                                                                               | 404                                                                               | 29.6                                                                               | 38.9                                                                                |
| $\Delta$ H<br>(kcal/mol)              | -2.52                                                                             | -2.94                                                                             | -13.8                                                                             | -2.37                                                                              | -3.69                                                                               |
| T $\Delta$ S<br>(kcal/mol)            | 2.78                                                                              | 2.14                                                                              | -9.16                                                                             | 4.03                                                                               | 2.42                                                                                |
| $\Delta$ G <sub>o</sub><br>(kcal/mol) | -5.30                                                                             | -5.08                                                                             | -4.64                                                                             | -6.40                                                                              | -6.11                                                                               |

<sup>a</sup>Calculated logD pH 7.4
